# Supplementary material for: Facile protocol for reduction of nitroarenes using magnetically recoverable CoM0.2Fe1.8O4 (M = Co, Ni, Cu and Zn) ferrite nanocatalysts
Source: Royal Society of Chemistry journal article supplement (doi:10.1039/c5ra07190a), 2015-01-01
Supplement: c5ra07190a1.pdf [file c5ra07190a1.pdf]

**Facile protocol for reduction of nitroarenes using magnetically recoverable  
CoM<sub>0.2</sub>Fe<sub>1.8</sub>O<sub>4</sub> (M=Co, Ni, Cu and Zn) ferrite nanocatalysts**

**Ankita Goyal<sup>a</sup>, Surbhi Kapoor<sup>a</sup>, Pankaj Samuel<sup>b</sup>, Vinod Kumar<sup>c</sup> and Sonal Singhal<sup>a\*</sup>**

<sup>a</sup>Department of Chemistry, Panjab University, Chandigarh, India-160014.

<sup>b</sup>SAIF, Panjab University, Chandigarh, India-160014.

<sup>c</sup>Icon Analytical Equipment (P) Ltd., Mumbai, 400018, India

\*[sonal1174@gmail.com](mailto:sonal1174@gmail.com); [sonal@pu.ac.in](mailto:sonal@pu.ac.in)

**CORRESPONDING AUTHOR:** Sonal Singhal  
Assistant Professor,  
Department of Chemistry,  
Panjab University,  
Chandigarh, India - 160 014  
Ph. No. +91-172-2534421(o)  
+91-09872118810(m)  
Fax No. +91-172-2545074  
**E-mail:** [sonal1174@gmail.com](mailto:sonal1174@gmail.com)

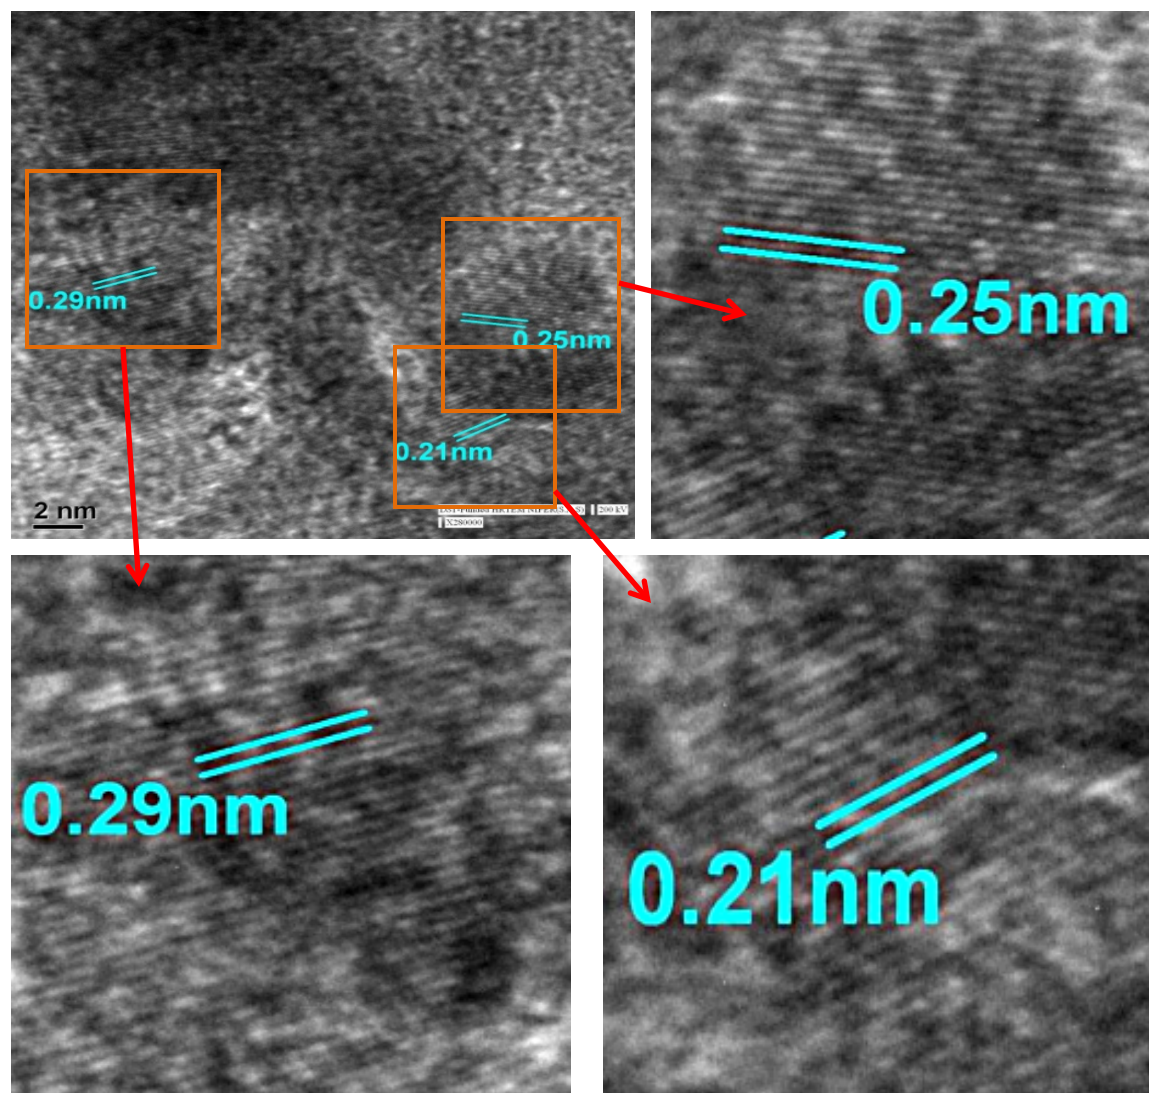

**Fig. S1.** A clear visualization of the interplanar distances shown in Fig. 4(b).

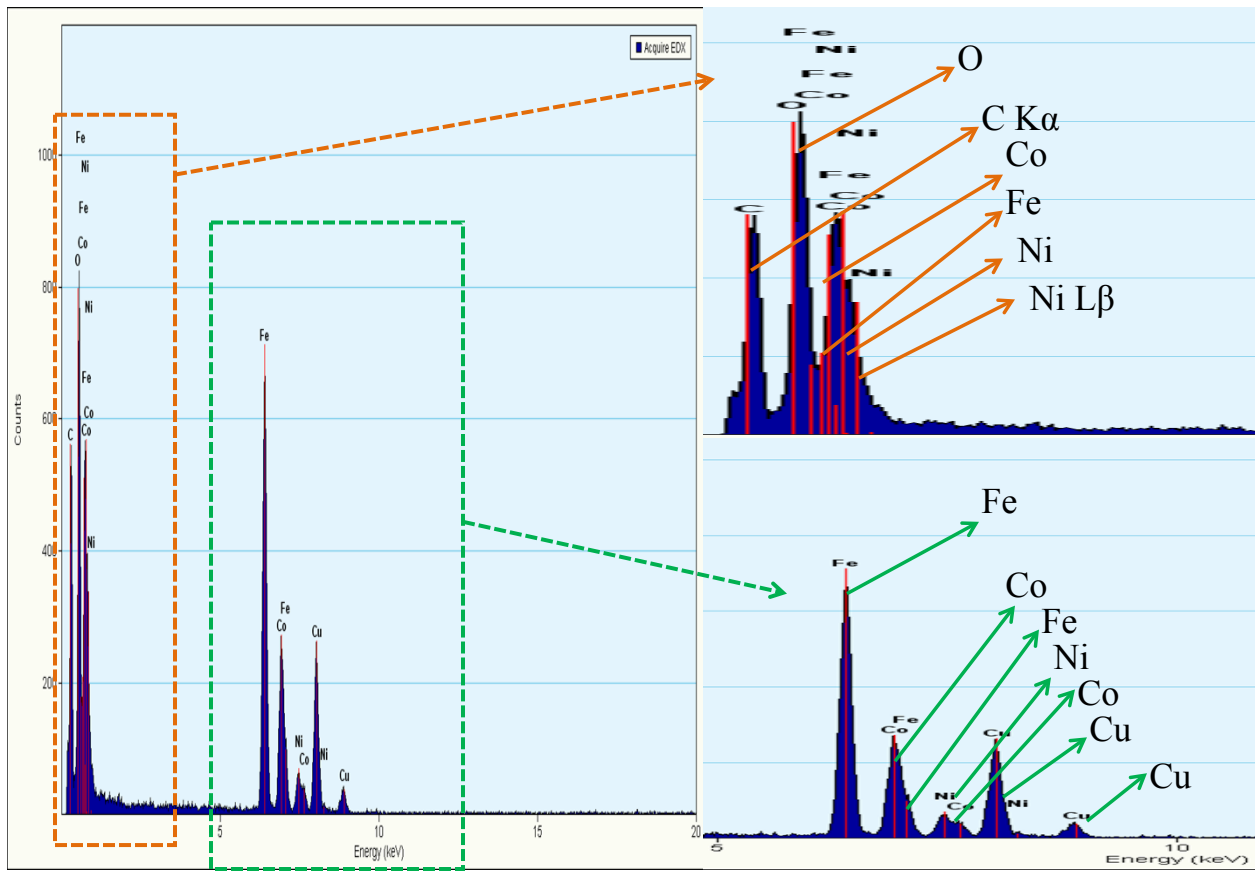

**Fig. S2.** A clear visualization and detailed description of signals corresponding to of K and L shells of elements present in the sample in the EDX pattern shown in Fig. 4(e).

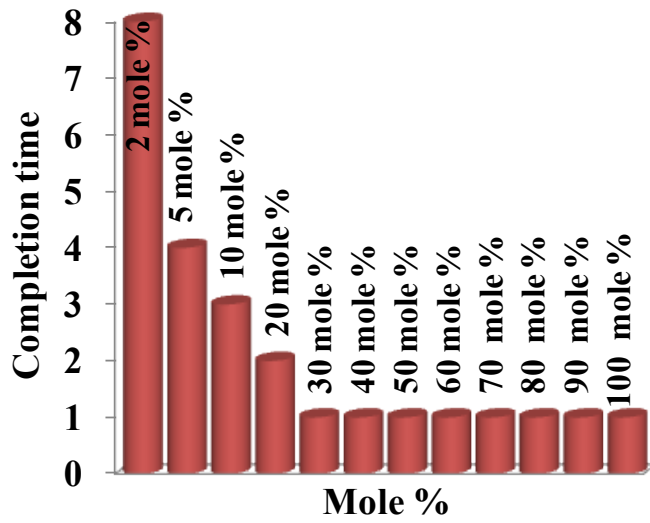

**Fig. S3.** The effect of catalyst loading on the completion time for the reduction of 2- nitrophenol.
